# Supplementary material
Source: publisher figshare collection journal article supplement (https://sage.figshare.com/ndownloader/files/22246968)
Supplement: Supplementary file 1 [file 22246968]

**Appendix**

Derivation of results (5) and (6):

First, the distribution of  could be derived based on the following pivotal quantity:

(A1)

The pivotal quantity (A1) is built on the central limit theorem with the belief that the simple estimator should be unbiased for the true average treatment effect .

Given the unobserved treated sample size is and the unobserved treated sample mean is , it is straightforward to write the ideal treated sample mean as below:

(A2)

Similarly, the ideal control sample mean is written as follows:

(A3)

The standard deviation associated with the simple estimator is derived as below:

(A4)

Furthermore, because and in observational studies, we can simply the expressions in (A2) through (A3) as follows:

(A5)

given and . Finally, we can just plug (A5) in (A1), which yields the distribution (5) whose mean and variance are defined by (6).

Theorem 1 can also be proved under a Bayesian framework. Assuming the prior and the likelihood for the treated outcome is as follows:

(A6)

And the prior and the likelihood for the control outcome is as follows:

(A7)

The posterior distribution for is as follows:

(A8)

Furthermore, the posterior distribution for is as follows:

(A9)

Assuming the treated and the control outcomes are independent, the posterior distribution of is equivalent to and has the identical form as (5) and (6).

Derivation of results (7) and (8):

When a significant positive effect has been concluded, the PIV can be expressed by , and as follows, drawing on (5) and (6):

(A10)

From (A10), the probit model for PIV can be derived as identical to (7).

Likewise, when a significant negative effect has been concluded, the PIV is expressed as follows:

(A11)

From (A11), the probit model for PIV can be derived as identical to (8).
